# Supplementary material for: Therapeutic Potential of Gramicidin S in the Treatment of Root Canal Infections
Source: MDPI journal article supplement (doi:10.3390/ph9030056), 2016-09-07

# Supplementary Materials: Therapeutic Potential of Gramicidin S in the Treatment of Root Canal Infections

Marina Berditsch, Hannah Lux, Oleg Babii, Sergii Afonin and Anne S. Ulrich

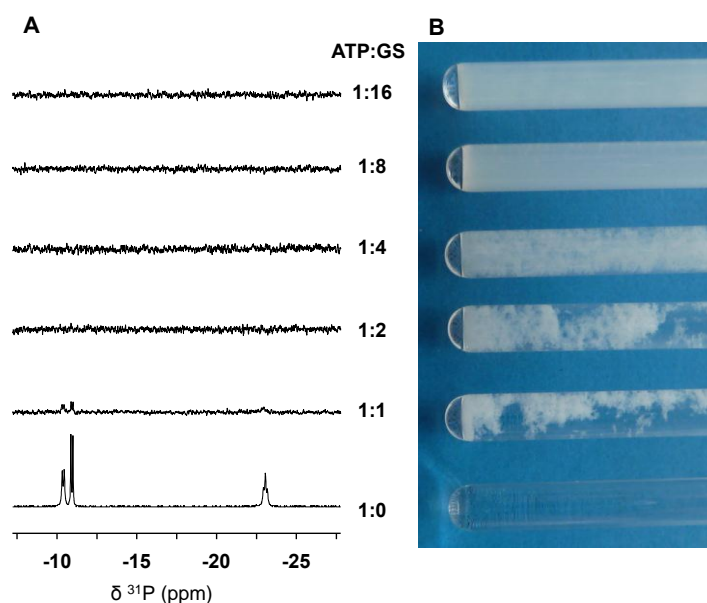

**Figure S1.** Binding of ATP by GS. (A) Upon titration,  $^{31}\text{P}$ -NMR spectra show the complete disappearance of ATP signals already at a molar ratio of ATP:GS 1:2. (B) Photographs of the NMR-samples (top view) reveal the formation of various dispersions. With increasing concentration of GS, initially some large floating precipitates are observed (ATP:GS ranging 1:1 to 1:4), before the samples transform into a stable milky emulsion (above ATP:GS 1:4).

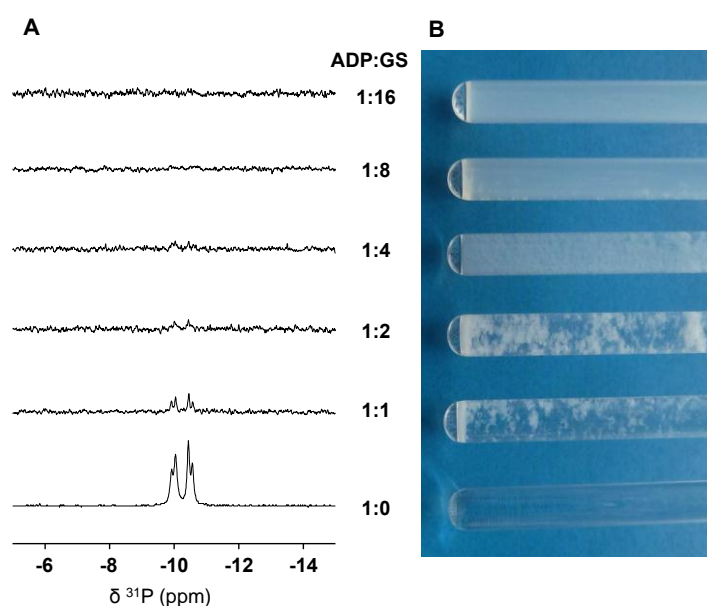

**Figure S2.** Binding of ADP by GS. (A) Upon titration,  $^{31}\text{P}$ -NMR spectra show the complete disappearance of ADP signals already at molar ratio of ADP:GS 1:8. (B) Photographs of the NMR-samples (top view) reveal the formation of various dispersions. With increasing concentration of GS, initially some large floating precipitates are observed (ADP:GS ranging 1:1 to 1:4), before the samples transform into a stable milky emulsion (above ADP:GS 1:4).

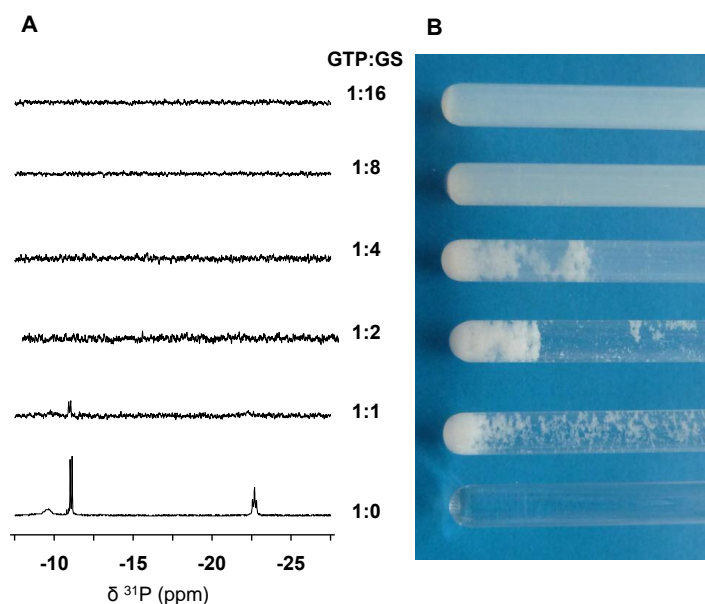

**Figure S3.** Binding of GTP by GS. (A) Upon titration, <sup>31</sup>P-NMR spectra show the complete disappearance of GTP signals already at molar ratio of GTP:GS 1:2. (B) Photographs of the NMR-samples (top view) reveal the formation of various dispersions. With increasing concentration of GS, initially some large floating precipitates are observed (GTP:GS ranging 1:1 to 1:4), before the samples transform into a stable milky emulsion (above GTP:GS 1:4).

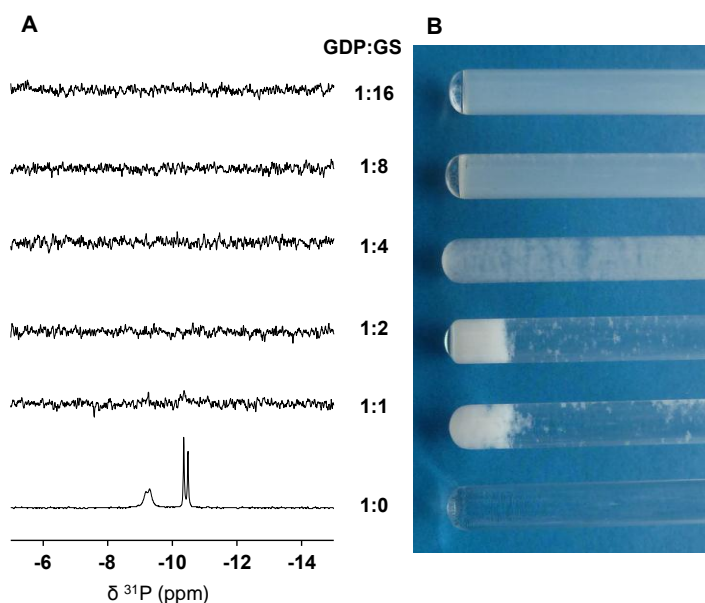

**Figure S4.** Binding of GDP by GS. (A) Upon titration, <sup>31</sup>P-NMR spectra show the complete disappearance of GDP signals already at molar ratio of GDP:GS 1:1. (B) Photographs of the NMR-samples (top view) reveal the formation of various dispersions. With increasing concentration of GS, initially some large floating precipitates are observed (GDP:GS ranging 1:1 to 1:4), before the samples transform into a stable milky emulsion (above GDP:GS 1:4).

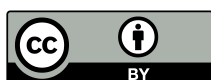

Supplement: s1 [file s1]
